# Supplementary material
Source: publisher figshare collection journal article supplement (https://acs.figshare.com/ndownloader/files/4188142)
Supplement: Supplementary file 1 [file 4188142]

data_General
_audit_creation_date                  '2011-11-16'
_audit_creation_method                'by CrystalStructure 3.8'
_audit_update_record                   ?

#==============================================================================

# PROCESSING SUMMARY (IUCr Office Use Only)

_journal_date_recd_electronic     ?
_journal_date_from_coeditor       ?
_journal_date_accepted            ?
_journal_coeditor_code            ?

#==============================================================================

# SUBMISSION DETAILS

_publ_contact_author_name             'ENTER NAME'
_publ_contact_author_email            'ENTER EMAIL ADDRESS'
_publ_contact_author_fax              'ENTER FAX NUMBER'
_publ_contact_author_phone            'ENTER PHONE NUMBER'
_publ_contact_letter
;
    ENTER TEXT OF LETTER
;
_publ_requested_journal               'ENTER JOURNAL NAME HERE'
_publ_requested_category              'CHOOSE FI FM FO CI CM CO or AD'
_publ_requested_coeditor_name          ?

#==============================================================================

# TITLE AND AUTHOR LIST

_publ_section_title
;
    ENTER SECTION TITLE
;
_publ_section_title_footnote
;
    ENTER FOOTNOTE TO TITLE OF PAPER
;
loop_
_publ_author_name
_publ_author_footnote
_publ_author_address
' FIRST AUTHORS NAME '
;
  FIRST AUTHORS FOOTNOTES
;
;
  FIRST AUTHORS ADDRESS
;
_publ_section_synopsis
;
  ENTER SYNOPSIS
;

#==============================================================================

# TEXT

_publ_section_abstract
;
    ENTER ABSTRACT
;
_publ_section_comment
;
    ENTER TEXT
;
_publ_section_references
;
    ENTER OTHER REFERENCES

    Rigaku Americas and Rigaku Corporation. (2007).
    CrystalStructure (Version 3.8). 
    Single Crystal Structure Analysis Software.
    Rigaku Americas, 9009 TX, USA 77381-5209.
    Rigaku, Tokyo 196-8666, Japan.

    M.C. Burla, R. Caliandro, M. Camalli, B. Carrozzini, 
    G.L. Cascarano, L. De Caro, C. Giacovazzo, G. Polidori, 
    R. Spagna (2005) 
    SIR2004

    Carruthers, J.R., Rollett,J.S., Betteridge, P.W.,
	 Kinna, D., Pearce, L., Larsen, A., and Gabe, E.(1999)
    CRYSTALS Issue 11, Chemical Crystallography Laboratory, Oxford, UK.

;
_publ_section_figure_captions
;
    ENTER FIGURE CAPTIONS
;
_publ_section_exptl_prep
;
    ENTER COMPOUND PREPARATION DETAILS
;
_publ_section_exptl_refinement
;
    ENTER SPECIAL DETAILS OF THE REFINEMENT
;

#==============================================================================

data__yuuni111115

#==============================================================================

# CHEMICAL DATA

_chemical_formula_sum                  'C25 H29 N O3 S '
_chemical_formula_moiety               'C25 H29 N O3 S '
_chemical_formula_weight               423.57
_chemical_melting_point                ?

#==============================================================================

# CRYSTAL DATA
_symmetry_cell_setting                 monoclinic
_symmetry_space_group_name_H-M        'P 1 21/n 1'
_symmetry_space_group_name_Hall       '-P 2yn'
_symmetry_Int_Tables_number            14
loop_
_symmetry_equiv_pos_site_id
_symmetry_equiv_pos_as_xyz
1   '+X,+Y,+Z'
2   '1/2-X,1/2+Y,1/2-Z'
3   '-X,-Y,-Z'
4   '1/2+X,1/2-Y,1/2+Z'

#------------------------------------------------------------------------------

_cell_length_a                         15.3524(7)
_cell_length_b                         8.8779(5)
_cell_length_c                         16.3754(8)
_cell_angle_alpha                      90.0000
_cell_angle_beta                       96.2616(14)
_cell_angle_gamma                      90.0000
_cell_volume                           2218.61(20)
_cell_formula_units_Z                  4
_cell_measurement_reflns_used          15232
_cell_measurement_theta_min            3.4
_cell_measurement_theta_max            27.4
_cell_measurement_temperature          150.1

#------------------------------------------------------------------------------

_exptl_crystal_description            'block'
_exptl_crystal_colour                 'colorless'
_exptl_crystal_size_max                0.40
_exptl_crystal_size_mid                0.30
_exptl_crystal_size_min                0.10
_exptl_crystal_density_diffrn          1.268
_exptl_crystal_density_meas            ?
_exptl_crystal_density_method         'not measured'
_exptl_crystal_F_000                   904.00
_exptl_absorpt_coefficient_mu          0.172
_exptl_absorpt_correction_type         multi-scan
_exptl_absorpt_process_details         
;
    Higashi, T. (1995). Program for Absorption Correction.
    Rigaku Corporation, Tokyo, Japan.
;
_exptl_absorpt_correction_T_min        0.791
_exptl_absorpt_correction_T_max        0.983

#==============================================================================

# EXPERIMENTAL DATA

_diffrn_radiation_type                'Mo K\a'
_diffrn_radiation_wavelength           0.71075
_diffrn_measurement_device_type       'Rigaku RAXIS-RAPID'
_diffrn_measurement_method             \w
_diffrn_detector_area_resol_mean       10.00
_diffrn_ambient_temperature            150.1
_diffrn_reflns_number                  21081
_diffrn_reflns_av_R_equivalents        0.036
_diffrn_reflns_theta_max               27.43
_diffrn_measured_fraction_theta_max    0.993
_diffrn_reflns_theta_full              27.43
_diffrn_measured_fraction_theta_full   0.993
_diffrn_reflns_limit_h_min             -19
_diffrn_reflns_limit_h_max             17
_diffrn_reflns_limit_k_min             -11
_diffrn_reflns_limit_k_max             11
_diffrn_reflns_limit_l_min             -21
_diffrn_reflns_limit_l_max             21

#==============================================================================

# REFINEMENT DATA

_refine_special_details
;
    Refinement was performed using all reflections. The weighted 
    R-factor (wR) and goodness of fit (S) are based on F^2^.
    R-factor (gt) are based on F. The threshold expression of
    F^2^ > 2.0 sigma(F^2^) is used only for calculating R-factor (gt). Terminal of the butyl group is disordered (C(25) and C(26) with occupancy of 0.5). Positions of hydrogens attached to C(24), C(25), and C(26) were not determined.
;
_reflns_number_total                   5030
_reflns_number_gt                      14317
_reflns_threshold_expression           F^2^>2.0\s(F^2^)
_refine_ls_structure_factor_coef       Fsqd
_refine_ls_R_factor_gt                 0.0557
_refine_ls_wR_factor_ref               0.1361
_refine_ls_hydrogen_treatment          refall
_refine_ls_number_reflns               21081
_refine_ls_number_parameters           304
_refine_ls_goodness_of_fit_ref         0.938
_refine_ls_weighting_scheme            calc
_refine_ls_weighting_details
'w = 1/[0.0007Fo^2^ + 3.0000\s(Fo^2^) + 0.5000]/(4Fo^2^)'
_refine_ls_shift/su_max                0.0050
_refine_diff_density_max               2.44
_refine_diff_density_min               -1.40
_refine_ls_extinction_method           none
_refine_ls_extinction_coef             ?

loop_
_atom_type_symbol
_atom_type_description
_atom_type_scat_dispersion_real
_atom_type_scat_dispersion_imag
_atom_type_scat_source
  'C' 'C'  0.003 0.002 
;
International Tables for Crystallography
(1992, Vol. C, Tables 4.2.6.8 and 6.1.1.4)
;
  'H' 'H'  0.000 0.000 
;
International Tables for Crystallography
(1992, Vol. C, Table 6.1.1.4)
;
  'O' 'O'  0.011 0.006 
;
International Tables for Crystallography
(1992, Vol. C, Tables 4.2.6.8 and 6.1.1.4)
;
  'N' 'N'  0.006 0.003 
;
International Tables for Crystallography
(1992, Vol. C, Tables 4.2.6.8 and 6.1.1.4)
;
  'S' 'S'  0.125 0.123 
;
International Tables for Crystallography
(1992, Vol. C, Tables 4.2.6.8 and 6.1.1.4)
;

#==============================================================================

# ATOMIC COORDINATES AND THERMAL PARAMETERS

loop_
_atom_site_label
_atom_site_type_symbol
_atom_site_fract_x
_atom_site_fract_y
_atom_site_fract_z
_atom_site_U_iso_or_equiv
_atom_site_adp_type
_atom_site_occupancy
_atom_site_symmetry_multiplicity
_atom_site_calc_flag
_atom_site_refinement_flags
_atom_site_disorder_assembly
_atom_site_disorder_group
 S(1) S 0.15132(2) 0.28669(3) 0.71404(2) 0.03469(8) Uani 1.00 1 d . . .
 O(1) O 0.22524(5) 0.24023(9) 0.67393(5) 0.0431(2) Uani 1.00 1 d . . .
 O(2) O 0.12079(5) 0.43803(9) 0.70321(6) 0.0472(2) Uani 1.00 1 d . . .
 O(3) O -0.10057(5) -0.31202(9) 0.73990(5) 0.0442(2) Uani 1.00 1 d . . .
 N(1) N 0.07020(5) 0.16967(10) 0.68025(6) 0.0306(2) Uani 1.00 1 d . . .
 C(1) C 0.09573(7) 0.03113(12) 0.64573(7) 0.0324(3) Uani 1.00 1 d . . .
 C(2) C 0.04722(7) -0.09303(12) 0.63955(7) 0.0314(3) Uani 1.00 1 d . . .
 C(3) C 0.07609(8) -0.23055(13) 0.59578(8) 0.0428(3) Uani 1.00 1 d . . .
 C(4) C 0.00995(8) -0.26835(15) 0.52228(8) 0.0481(4) Uani 1.00 1 d . . .
 C(5) C -0.08123(8) -0.28609(15) 0.54881(8) 0.0469(3) Uani 1.00 1 d . . .
 C(6) C -0.10893(7) -0.14746(13) 0.59502(7) 0.0367(3) Uani 1.00 1 d . . .
 C(7) C -0.04265(7) -0.10205(12) 0.66884(7) 0.0284(2) Uani 1.00 1 d . . .
 C(8) C -0.06786(6) 0.04820(12) 0.70568(6) 0.0270(2) Uani 1.00 1 d . . .
 C(9) C -0.14861(7) 0.05787(13) 0.73613(7) 0.0332(3) Uani 1.00 1 d . . .
 C(10) C -0.17835(7) 0.18943(14) 0.76838(8) 0.0411(3) Uani 1.00 1 d . . .
 C(11) C -0.12651(8) 0.31586(14) 0.76879(8) 0.0431(3) Uani 1.00 1 d . . .
 C(12) C -0.04590(7) 0.31119(13) 0.73946(7) 0.0366(3) Uani 1.00 1 d . . .
 C(13) C -0.01459(6) 0.17701(12) 0.70955(7) 0.0275(2) Uani 1.00 1 d . . .
 C(14) C 0.17287(6) 0.25054(12) 0.81941(7) 0.0311(3) Uani 1.00 1 d . . .
 C(15) C 0.19993(7) 0.10669(13) 0.84501(8) 0.0355(3) Uani 1.00 1 d . . .
 C(16) C 0.22032(7) 0.07763(15) 0.92736(8) 0.0432(3) Uani 1.00 1 d . . .
 C(17) C 0.21525(8) 0.18965(17) 0.98609(8) 0.0494(4) Uani 1.00 1 d . . .
 C(18) C 0.18839(9) 0.33236(17) 0.95914(9) 0.0570(4) Uani 1.00 1 d . . .
 C(19) C 0.16724(8) 0.36461(15) 0.87657(9) 0.0459(3) Uani 1.00 1 d . . .
 C(20) C 0.24192(11) 0.1574(2) 1.07617(10) 0.0840(6) Uani 1.00 1 d . . .
 C(21) C -0.04260(7) -0.21877(13) 0.73938(7) 0.0332(3) Uani 1.00 1 d . . .
 C(22) C 0.02941(8) -0.20709(15) 0.80933(8) 0.0477(3) Uani 1.00 1 d . . .
 C(23) C 0.01135(9) -0.29195(17) 0.88614(8) 0.0579(4) Uani 1.00 1 d . . .
 C(24) C 0.07945(12) -0.2630(2) 0.95866(11) 0.0849(6) Uani 1.00 1 d . . .
 C(25) C 0.0666(2) -0.3243(4) 1.03305(19) 0.0843(12) Uani 0.50 1 d P . .
 C(26) C 0.0415(2) -0.1313(4) 1.0108(2) 0.0777(11) Uani 0.50 1 d P . .
 H(1) H 0.1514 0.0274 0.6256 0.040 Uiso 1.00 1 c R . .
 H(2) H 0.1316 -0.2114 0.5773 0.052 Uiso 1.00 1 c R . .
 H(3) H 0.0808 -0.3135 0.6327 0.052 Uiso 1.00 1 c R . .
 H(4) H 0.0094 -0.1895 0.4830 0.059 Uiso 1.00 1 c R . .
 H(5) H 0.0267 -0.3599 0.4983 0.059 Uiso 1.00 1 c R . .
 H(6) H -0.1217 -0.3010 0.5013 0.056 Uiso 1.00 1 c R . .
 H(7) H -0.0818 -0.3715 0.5837 0.056 Uiso 1.00 1 c R . .
 H(8) H -0.1154 -0.0652 0.5577 0.044 Uiso 1.00 1 c R . .
 H(9) H -0.1636 -0.1682 0.6148 0.043 Uiso 1.00 1 c R . .
 H(10) H -0.1846 -0.0294 0.7348 0.039 Uiso 1.00 1 c R . .
 H(11) H -0.2334 0.1925 0.7898 0.049 Uiso 1.00 1 c R . .
 H(12) H -0.1466 0.4079 0.7896 0.052 Uiso 1.00 1 c R . .
 H(13) H -0.0114 0.4000 0.7395 0.042 Uiso 1.00 1 c R . .
 H(14) H 0.2041 0.0289 0.8058 0.042 Uiso 1.00 1 c R . .
 H(15) H 0.2382 -0.0209 0.9445 0.051 Uiso 1.00 1 c R . .
 H(16) H 0.1845 0.4101 0.9984 0.069 Uiso 1.00 1 c R . .
 H(17) H 0.1492 0.4630 0.8593 0.055 Uiso 1.00 1 c R . .
 H(18) H 0.0813 -0.2475 0.7912 0.056 Uiso 1.00 1 c R . .
 H(19) H 0.0383 -0.1037 0.8228 0.057 Uiso 1.00 1 c R . .
 H(20) H -0.0447 -0.2616 0.8997 0.071 Uiso 1.00 1 c R . .
 H(21) H 0.0106 -0.3968 0.8745 0.069 Uiso 1.00 1 c R . .
 H(24) H 0.1923 0.1232 1.1007 0.103 Uiso 1.00 1 c R . .
 H(25) H 0.2636 0.2472 1.1026 0.104 Uiso 1.00 1 c R . .
 H(26) H 0.2862 0.0822 1.0818 0.102 Uiso 1.00 1 c R . .


loop_
_atom_site_aniso_label
_atom_site_aniso_U_11
_atom_site_aniso_U_22
_atom_site_aniso_U_33
_atom_site_aniso_U_12
_atom_site_aniso_U_13
_atom_site_aniso_U_23
 S(1) 0.02889(15) 0.02735(16) 0.04779(19) -0.00691(12) 0.00394(13) 0.00415(13)
 O(1) 0.0321(4) 0.0459(5) 0.0532(5) -0.0116(3) 0.0132(4) 0.0018(4)
 O(2) 0.0413(4) 0.0264(4) 0.0722(6) -0.0066(3) -0.0014(4) 0.0120(4)
 O(3) 0.0411(4) 0.0325(5) 0.0605(5) -0.0051(3) 0.0120(4) 0.0118(4)
 N(1) 0.0262(4) 0.0268(5) 0.0392(5) -0.0042(3) 0.0050(4) -0.0001(4)
 C(1) 0.0288(5) 0.0313(6) 0.0387(6) 0.0003(4) 0.0103(5) 0.0009(5)
 C(2) 0.0314(5) 0.0269(6) 0.0366(6) 0.0036(4) 0.0067(5) 0.0037(4)
 C(3) 0.0439(6) 0.0299(6) 0.0573(8) 0.0004(5) 0.0171(6) -0.0038(5)
 C(4) 0.0632(8) 0.0344(7) 0.0495(8) -0.0048(6) 0.0187(6) -0.0106(6)
 C(5) 0.0544(7) 0.0388(7) 0.0473(7) -0.0098(6) 0.0050(6) -0.0078(6)
 C(6) 0.0364(6) 0.0328(6) 0.0406(7) -0.0051(5) 0.0027(5) -0.0011(5)
 C(7) 0.0256(5) 0.0237(5) 0.0360(6) -0.0013(4) 0.0044(4) 0.0019(4)
 C(8) 0.0255(5) 0.0259(6) 0.0291(6) 0.0017(4) 0.0008(4) 0.0054(4)
 C(9) 0.0258(5) 0.0297(6) 0.0441(7) -0.0006(4) 0.0039(5) 0.0029(5)
 C(10) 0.0284(5) 0.0419(7) 0.0537(8) 0.0045(5) 0.0077(5) -0.0025(6)
 C(11) 0.0358(6) 0.0350(7) 0.0587(8) 0.0059(5) 0.0059(5) -0.0117(6)
 C(12) 0.0334(6) 0.0272(6) 0.0486(7) 0.0004(4) 0.0016(5) -0.0042(5)
 C(13) 0.0251(5) 0.0265(6) 0.0301(5) 0.0017(4) 0.0001(4) 0.0026(4)
 C(14) 0.0209(5) 0.0292(6) 0.0433(6) -0.0025(4) 0.0040(4) -0.0029(5)
 C(15) 0.0285(5) 0.0325(6) 0.0443(7) -0.0018(4) -0.0009(5) -0.0043(5)
 C(16) 0.0320(6) 0.0435(8) 0.0530(8) -0.0036(5) -0.0008(6) 0.0073(6)
 C(17) 0.0287(6) 0.0727(10) 0.0467(8) -0.0008(6) 0.0041(5) 0.0004(7)
 C(18) 0.0447(7) 0.0709(10) 0.0553(9) 0.0094(7) 0.0043(6) -0.0263(7)
 C(19) 0.0382(6) 0.0374(7) 0.0607(9) 0.0068(5) -0.0002(6) -0.0099(6)
 C(20) 0.0657(10) 0.1375(17) 0.0484(9) 0.0087(10) 0.0048(8) 0.0004(10)
 C(21) 0.0332(5) 0.0233(5) 0.0442(7) 0.0032(5) 0.0098(5) 0.0022(5)
 C(22) 0.0521(7) 0.0335(7) 0.0549(8) -0.0032(5) -0.0052(6) 0.0112(6)
 C(23) 0.0633(9) 0.0650(10) 0.0461(8) 0.0157(7) 0.0086(7) 0.0097(7)
 C(24) 0.1046(14) 0.0737(12) 0.0683(12) 0.0028(10) -0.0275(10) 0.0002(9)
 C(25) 0.091(2) 0.124(3) 0.0379(18) -0.019(2) 0.0090(16) 0.0285(19)
 C(26) 0.068(2) 0.093(2) 0.069(2) -0.0020(18) -0.0033(17) -0.027(2)

#==============================================================================

_computing_data_collection            'PROCESS-AUTO'
_computing_cell_refinement            'PROCESS-AUTO'
_computing_data_reduction             'CrystalStructure'
_computing_structure_solution         'SIR2004'
_computing_structure_refinement       'CRYSTALS'
_computing_publication_material       'CrystalStructure 3.8'
_computing_molecular_graphics          ?

#==============================================================================

# MOLECULAR GEOMETRY

_geom_special_details
;
    Terminal of the butyl group is disordered (C(25) and C(26) with occupancy of 0.5). Positions of hydrogens attached to C(24), C(25), and C(26) were not determined.
;

loop_
_geom_bond_atom_site_label_1
_geom_bond_atom_site_label_2
_geom_bond_distance
_geom_bond_publ_flag
_geom_bond_site_symmetry_1
_geom_bond_site_symmetry_2
S(1) O(1) 1.4325(8) yes . .
S(1) O(2) 1.4277(8) yes . .
S(1) N(1) 1.6692(8) yes . .
S(1) C(14) 1.7508(11) yes . .
O(3) C(21) 1.2162(13) yes . .
N(1) C(1) 1.4263(14) yes . .
N(1) C(13) 1.4371(13) yes . .
C(1) C(2) 1.3280(15) yes . .
C(2) C(3) 1.5067(16) yes . .
C(2) C(7) 1.5114(15) yes . .
C(3) C(4) 1.5250(17) yes . .
C(4) C(5) 1.5185(18) yes . .
C(5) C(6) 1.5292(17) yes . .
C(6) C(7) 1.5463(15) yes . .
C(7) C(8) 1.5310(15) yes . .
C(7) C(21) 1.5517(16) yes . .
C(8) C(9) 1.3884(14) yes . .
C(8) C(13) 1.4033(14) yes . .
C(9) C(10) 1.3799(17) yes . .
C(10) C(11) 1.3756(17) yes . .
C(11) C(12) 1.3761(17) yes . .
C(12) C(13) 1.3933(15) yes . .
C(14) C(15) 1.3933(15) yes . .
C(14) C(19) 1.3881(17) yes . .
C(15) C(16) 1.3751(18) yes . .
C(16) C(17) 1.3915(19) yes . .
C(17) C(18) 1.389(2) yes . .
C(17) C(20) 1.515(2) yes . .
C(18) C(19) 1.386(2) yes . .
C(21) C(22) 1.5062(15) yes . .
C(22) C(23) 1.5174(19) yes . .
C(23) C(24) 1.516(2) yes . .
C(25) C(26) 1.785(5) yes . .
C(1) H(1) 0.950 no . .
C(3) H(2) 0.950 no . .
C(3) H(3) 0.950 no . .
C(4) H(4) 0.950 no . .
C(4) H(5) 0.950 no . .
C(5) H(6) 0.950 no . .
C(5) H(7) 0.950 no . .
C(6) H(8) 0.950 no . .
C(6) H(9) 0.950 no . .
C(9) H(10) 0.950 no . .
C(10) H(11) 0.950 no . .
C(11) H(12) 0.950 no . .
C(12) H(13) 0.950 no . .
C(15) H(14) 0.950 no . .
C(16) H(15) 0.950 no . .
C(18) H(16) 0.950 no . .
C(19) H(17) 0.950 no . .
C(20) H(24) 0.950 no . .
C(20) H(25) 0.950 no . .
C(20) H(26) 0.950 no . .
C(22) H(18) 0.950 no . .
C(22) H(19) 0.950 no . .
C(23) H(20) 0.950 no . .
C(23) H(21) 0.950 no . .

loop_
_geom_angle_atom_site_label_1
_geom_angle_atom_site_label_2
_geom_angle_atom_site_label_3
_geom_angle
_geom_angle_publ_flag
_geom_angle_site_symmetry_1
_geom_angle_site_symmetry_2
_geom_angle_site_symmetry_3
O(1) S(1) O(2) 118.67(5) yes . . .
O(1) S(1) N(1) 105.58(4) yes . . .
O(1) S(1) C(14) 108.97(4) yes . . .
O(2) S(1) N(1) 108.76(4) yes . . .
O(2) S(1) C(14) 108.61(5) yes . . .
N(1) S(1) C(14) 105.46(4) yes . . .
S(1) N(1) C(1) 116.15(6) yes . . .
S(1) N(1) C(13) 122.10(7) yes . . .
C(1) N(1) C(13) 118.00(8) yes . . .
N(1) C(1) C(2) 124.75(10) yes . . .
C(1) C(2) C(3) 121.15(10) yes . . .
C(1) C(2) C(7) 122.93(10) yes . . .
C(3) C(2) C(7) 115.73(9) yes . . .
C(2) C(3) C(4) 110.41(9) yes . . .
C(3) C(4) C(5) 110.63(10) yes . . .
C(4) C(5) C(6) 111.89(10) yes . . .
C(5) C(6) C(7) 113.70(9) yes . . .
C(2) C(7) C(6) 108.14(9) yes . . .
C(2) C(7) C(8) 110.95(8) yes . . .
C(2) C(7) C(21) 110.20(8) yes . . .
C(6) C(7) C(8) 111.23(8) yes . . .
C(6) C(7) C(21) 110.78(8) yes . . .
C(8) C(7) C(21) 105.55(8) yes . . .
C(7) C(8) C(9) 117.99(9) yes . . .
C(7) C(8) C(13) 123.83(8) yes . . .
C(9) C(8) C(13) 118.18(9) yes . . .
C(8) C(9) C(10) 122.37(10) yes . . .
C(9) C(10) C(11) 118.50(11) yes . . .
C(10) C(11) C(12) 121.04(11) yes . . .
C(11) C(12) C(13) 120.42(10) yes . . .
N(1) C(13) C(8) 119.51(9) yes . . .
N(1) C(13) C(12) 121.06(9) yes . . .
C(8) C(13) C(12) 119.40(9) yes . . .
S(1) C(14) C(15) 118.86(8) yes . . .
S(1) C(14) C(19) 120.79(8) yes . . .
C(15) C(14) C(19) 120.28(11) yes . . .
C(14) C(15) C(16) 119.70(11) yes . . .
C(15) C(16) C(17) 121.32(12) yes . . .
C(16) C(17) C(18) 117.98(12) yes . . .
C(16) C(17) C(20) 120.56(13) yes . . .
C(18) C(17) C(20) 121.41(13) yes . . .
C(17) C(18) C(19) 121.89(13) yes . . .
C(14) C(19) C(18) 118.82(12) yes . . .
O(3) C(21) C(7) 121.25(9) yes . . .
O(3) C(21) C(22) 121.23(10) yes . . .
C(7) C(21) C(22) 117.44(9) yes . . .
C(21) C(22) C(23) 114.26(10) yes . . .
C(22) C(23) C(24) 113.10(12) yes . . .
C(23) C(24) C(25) 118.4(2) yes . . .
C(23) C(24) C(26) 106.41(16) yes . . .
C(25) C(24) C(26) 73.6(2) yes . . .
C(24) C(25) C(26) 59.0(2) yes . . .
C(24) C(26) C(25) 47.35(16) yes . . .
N(1) C(1) H(1) 117.7 no . . .
C(2) C(1) H(1) 117.6 no . . .
C(2) C(3) H(2) 109.1 no . . .
C(2) C(3) H(3) 109.3 no . . .
C(4) C(3) H(2) 109.3 no . . .
C(4) C(3) H(3) 109.2 no . . .
H(2) C(3) H(3) 109.5 no . . .
C(3) C(4) H(4) 109.2 no . . .
C(3) C(4) H(5) 109.1 no . . .
C(5) C(4) H(4) 109.3 no . . .
C(5) C(4) H(5) 109.2 no . . .
H(4) C(4) H(5) 109.5 no . . .
C(4) C(5) H(6) 108.8 no . . .
C(4) C(5) H(7) 108.9 no . . .
C(6) C(5) H(6) 108.9 no . . .
C(6) C(5) H(7) 108.8 no . . .
H(6) C(5) H(7) 109.5 no . . .
C(5) C(6) H(8) 108.4 no . . .
C(5) C(6) H(9) 108.5 no . . .
C(7) C(6) H(8) 108.4 no . . .
C(7) C(6) H(9) 108.3 no . . .
H(8) C(6) H(9) 109.5 no . . .
C(8) C(9) H(10) 118.7 no . . .
C(10) C(9) H(10) 118.9 no . . .
C(9) C(10) H(11) 120.7 no . . .
C(11) C(10) H(11) 120.8 no . . .
C(10) C(11) H(12) 119.6 no . . .
C(12) C(11) H(12) 119.4 no . . .
C(11) C(12) H(13) 119.8 no . . .
C(13) C(12) H(13) 119.8 no . . .
C(14) C(15) H(14) 120.2 no . . .
C(16) C(15) H(14) 120.1 no . . .
C(15) C(16) H(15) 119.3 no . . .
C(17) C(16) H(15) 119.3 no . . .
C(17) C(18) H(16) 119.1 no . . .
C(19) C(18) H(16) 119.0 no . . .
C(14) C(19) H(17) 120.5 no . . .
C(18) C(19) H(17) 120.7 no . . .
C(17) C(20) H(24) 109.2 no . . .
C(17) C(20) H(25) 109.2 no . . .
C(17) C(20) H(26) 110.0 no . . .
H(24) C(20) H(25) 109.5 no . . .
H(24) C(20) H(26) 109.5 no . . .
H(25) C(20) H(26) 109.5 no . . .
C(21) C(22) H(18) 107.9 no . . .
C(21) C(22) H(19) 108.5 no . . .
C(23) C(22) H(18) 107.9 no . . .
C(23) C(22) H(19) 108.8 no . . .
H(18) C(22) H(19) 109.5 no . . .
C(22) C(23) H(20) 107.7 no . . .
C(22) C(23) H(21) 108.6 no . . .
C(24) C(23) H(20) 109.5 no . . .
C(24) C(23) H(21) 108.4 no . . .
H(20) C(23) H(21) 109.5 no . . .

loop_
_geom_torsion_atom_site_label_1
_geom_torsion_atom_site_label_2
_geom_torsion_atom_site_label_3
_geom_torsion_atom_site_label_4
_geom_torsion
_geom_torsion_publ_flag
_geom_torsion_site_symmetry_1
_geom_torsion_site_symmetry_2
_geom_torsion_site_symmetry_3
_geom_torsion_site_symmetry_4
O(1) S(1) N(1) C(1) 19.69(9) ? . . . .
O(1) S(1) N(1) C(13) 177.42(8) ? . . . .
O(1) S(1) C(14) C(15) -52.17(9) ? . . . .
O(1) S(1) C(14) C(19) 124.79(9) ? . . . .
O(2) S(1) N(1) C(1) 148.06(8) ? . . . .
O(2) S(1) N(1) C(13) -54.21(9) ? . . . .
O(2) S(1) C(14) C(15) 177.21(8) ? . . . .
O(2) S(1) C(14) C(19) -5.83(10) ? . . . .
N(1) S(1) C(14) C(15) 60.77(9) ? . . . .
N(1) S(1) C(14) C(19) -122.27(9) ? . . . .
C(14) S(1) N(1) C(1) -95.60(8) ? . . . .
C(14) S(1) N(1) C(13) 62.13(9) ? . . . .
S(1) N(1) C(1) C(2) 157.75(9) ? . . . .
S(1) N(1) C(13) C(8) -155.43(8) ? . . . .
S(1) N(1) C(13) C(12) 26.53(14) ? . . . .
C(1) N(1) C(13) C(8) 1.91(14) ? . . . .
C(1) N(1) C(13) C(12) -176.13(9) ? . . . .
C(13) N(1) C(1) C(2) -0.93(15) ? . . . .
N(1) C(1) C(2) C(3) 174.81(10) ? . . . .
N(1) C(1) C(2) C(7) 0.13(17) ? . . . .
C(1) C(2) C(3) C(4) -118.44(12) ? . . . .
C(1) C(2) C(7) C(6) 121.98(11) ? . . . .
C(1) C(2) C(7) C(8) -0.26(14) ? . . . .
C(1) C(2) C(7) C(21) -116.80(11) ? . . . .
C(3) C(2) C(7) C(6) -52.96(12) ? . . . .
C(3) C(2) C(7) C(8) -175.20(9) ? . . . .
C(3) C(2) C(7) C(21) 68.26(12) ? . . . .
C(7) C(2) C(3) C(4) 56.60(13) ? . . . .
C(2) C(3) C(4) C(5) -55.00(13) ? . . . .
C(3) C(4) C(5) C(6) 54.70(13) ? . . . .
C(4) C(5) C(6) C(7) -53.80(13) ? . . . .
C(5) C(6) C(7) C(2) 50.60(12) ? . . . .
C(5) C(6) C(7) C(8) 172.68(9) ? . . . .
C(5) C(6) C(7) C(21) -70.26(12) ? . . . .
C(2) C(7) C(8) C(9) -179.47(9) ? . . . .
C(2) C(7) C(8) C(13) 1.32(13) ? . . . .
C(2) C(7) C(21) O(3) -133.59(11) ? . . . .
C(2) C(7) C(21) C(22) 49.48(13) ? . . . .
C(6) C(7) C(8) C(9) 60.10(12) ? . . . .
C(6) C(7) C(8) C(13) -119.11(10) ? . . . .
C(6) C(7) C(21) O(3) -13.96(15) ? . . . .
C(6) C(7) C(21) C(22) 169.11(10) ? . . . .
C(8) C(7) C(21) O(3) 106.55(11) ? . . . .
C(8) C(7) C(21) C(22) -70.38(11) ? . . . .
C(21) C(7) C(8) C(9) -60.11(11) ? . . . .
C(21) C(7) C(8) C(13) 120.68(10) ? . . . .
C(7) C(8) C(9) C(10) -178.12(10) ? . . . .
C(7) C(8) C(13) N(1) -2.19(15) ? . . . .
C(7) C(8) C(13) C(12) 175.87(9) ? . . . .
C(9) C(8) C(13) N(1) 178.59(9) ? . . . .
C(9) C(8) C(13) C(12) -3.34(15) ? . . . .
C(13) C(8) C(9) C(10) 1.14(15) ? . . . .
C(8) C(9) C(10) C(11) 1.24(17) ? . . . .
C(9) C(10) C(11) C(12) -1.41(18) ? . . . .
C(10) C(11) C(12) C(13) -0.81(18) ? . . . .
C(11) C(12) C(13) N(1) -178.74(10) ? . . . .
C(11) C(12) C(13) C(8) 3.22(16) ? . . . .
S(1) C(14) C(15) C(16) 177.58(8) ? . . . .
S(1) C(14) C(19) C(18) -177.35(9) ? . . . .
C(15) C(14) C(19) C(18) -0.43(17) ? . . . .
C(19) C(14) C(15) C(16) 0.60(16) ? . . . .
C(14) C(15) C(16) C(17) -0.56(16) ? . . . .
C(15) C(16) C(17) C(18) 0.35(18) ? . . . .
C(15) C(16) C(17) C(20) -177.20(12) ? . . . .
C(16) C(17) C(18) C(19) -0.18(19) ? . . . .
C(20) C(17) C(18) C(19) 177.35(13) ? . . . .
C(17) C(18) C(19) C(14) 0.22(19) ? . . . .
O(3) C(21) C(22) C(23) -13.88(17) ? . . . .
C(7) C(21) C(22) C(23) 163.04(10) ? . . . .
C(21) C(22) C(23) C(24) -173.02(12) ? . . . .
C(22) C(23) C(24) C(25) 175.1(2) ? . . . .
C(22) C(23) C(24) C(26) 95.16(19) ? . . . .
C(23) C(24) C(25) C(26) -100.1(2) ? . . . .
C(23) C(24) C(26) C(25) 115.5(2) ? . . . .


#==============================================================================

# Additional structures and associated data_? identifiers
# should be added at this point if there is more than one 
# structure analysis in the CIF.

#==============================================================================

#     End of CIF

#==============================================================================
